# Supplementary material
Source: PubMed Central journal article supplement (PMC5361404)
Supplement: NIHMS126610-supplement-1.pdf [file NIHMS126610-supplement-1.pdf]

## Supplementary Material

### Appendix 1: Data elements used in risk adjustment models

Age

Female

Heart failure

Arrhythmia

Chronic obstructive pulmonary  
disease (COPD)

Fluid and electrolyte imbalance

Renal failure

Neurological disease

Paralysis

Liver disease

Lymphoma

Metastatic cancer

Weight loss

Dementia

Coagulopathy

AMI location anterior and lateral

AMI location inferior and posterior

AMI location other site
